# Supplementary material
Source: publisher figshare collection journal article supplement (https://rs.figshare.com/ndownloader/files/20275320)
Supplement: Supplementary file 1 [file 20275320]

**Automated analysis of scanning electron microscopic images for assessment of hair surface damage**

Fanny Chu1,2*, Deon S. Anex1, A. Daniel Jones3, Bradley R. Hart1

1Lawrence Livermore National Laboratory, 7000 East Ave. Livermore, CA 94550

2Department of Chemistry, Michigan State University, 578 S Shaw Ln East Lansing, MI 48824

3Department of Biochemistry and Molecular Biology, 603 Wilson Rd. East Lansing, MI 48824

***Corresponding Author**

Fanny Chu

7000 East Ave. L-173

Livermore, CA 94550

925.423.0684

chu28@llnl.gov

**
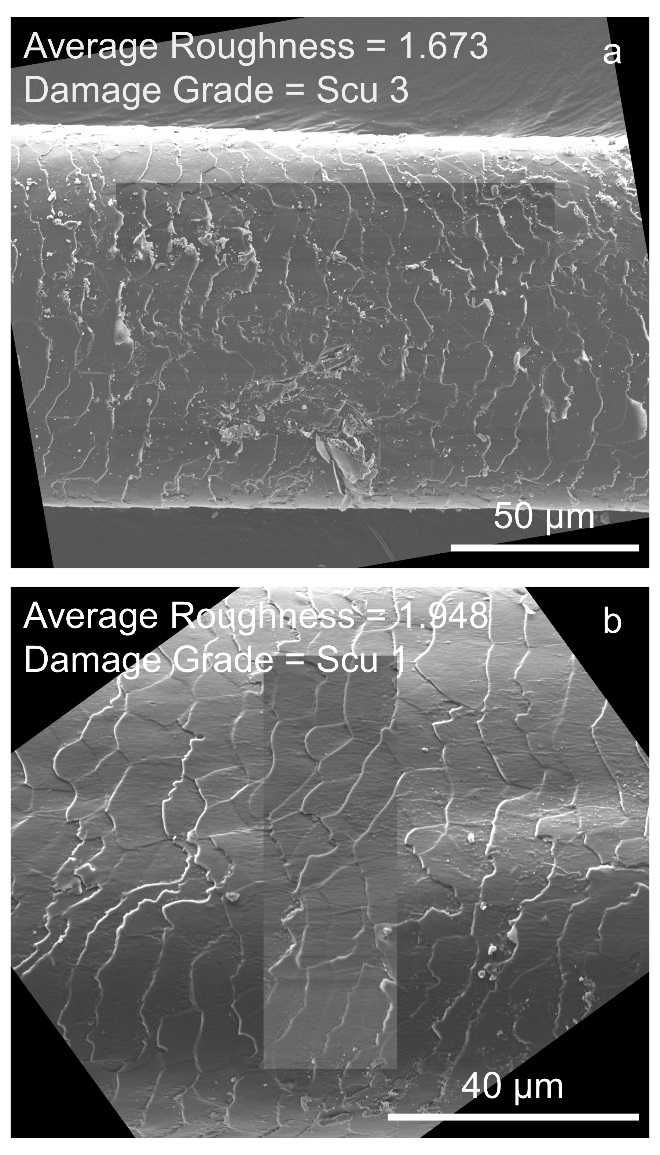
**

**Figure S1.** Example rotated SEM images with overlays of normalized regions of interest from (a) Hair Sample 1 and (b) Hair Sample 4 that exhibit similar average image roughness but vastly different extents of damage, as assessed with the SEM damage grade system. Average image roughness fails to effectively characterize hair surface damage.


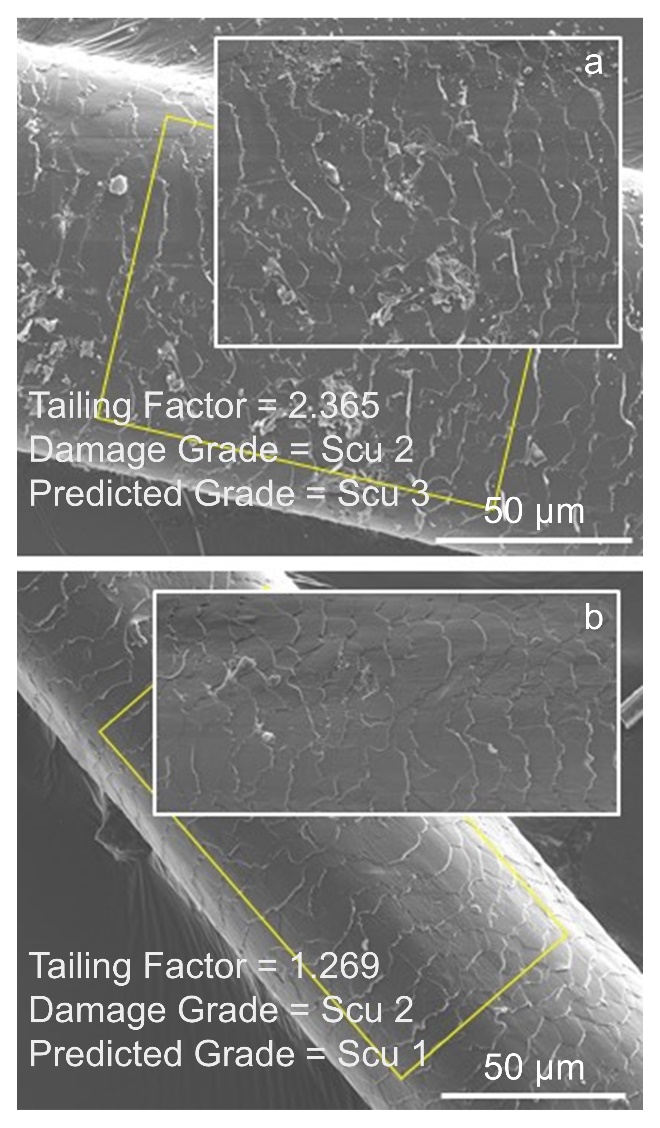


**Figure S2.** Example SEM images of hair segments with normalized regions of interest from (a) Hair Sample 1 (exploded) and (b) Hair Sample 5 (control) whose damage grades were incorrectly predicted by the kNN model.

**Appendix 1.** ImageJ macros (for version 1.52k) to normalize SEM images of hair fibers and quantify hair surface damage using tailing factor.

Hair Damage Quantification Menu Tool:

1. Duplicate and Crop Action Tool – duplicates raw image input (TIFF file) and crops out SEM image acquisition parameter label

2. Measure Angle and Rotate Action Tool – measures angle of hair segment with respect to transverse axis and rotates image so that hair segment lies along the transverse axis

3. Normalize Image Action Tool – defines region of interest (ROI) according to Eqs. 1 – 3 and normalizes ROI according to Eqs. 4 and 5

4. Calculate Histogram Peak Tailing Action Tool – calculates peak lag tailing from brightness histogram of normalized ROI at 2% of peak height maximum according to Eqs. 10 – 12

//series of macros containing duplicate and crop (to remove SEM image label), measure angle and rotate (to orient

//hair length to lie along the transverse axis), normalize image, and calculate peak tailing factor (to quantify hair

//surface damage)

var sCmds = newMenu("Hair Damage Quantification Menu Tool", newArray("Duplicate and Crop Action Tool", "Measure Angle and Rotate Action Tool", "-", "Normalize Image Action Tool", "Calculate Histogram Peak Tailing Action Tool"));

//menu macro to run selected macro

macro "Hair Damage Quantification Menu Tool - Cf00T1a12HC2a0T4c12DC000T7g12Q" {

cmd = getArgument();

if (cmd!="-")

run(cmd);

}

//duplicate and crop macro

//requires raw image input to be TIFF file

//duplicates SEM image and crops label after identifying where label begins (a horizontal line composed entirely of //white pixels at 255)

macro "Duplicate and Crop Action Tool" {

orig_name = getTitle();

//duplicates image

run("Duplicate...", " ");

new_name = replace(orig_name, ".tif", "_ImageJ.tif");

//renames duplicated image

rename(new_name);

//gets dimensions of image in pixels

image_length = getWidth(); //hair segment length along transverse axis

image_height = getHeight(); //hair segment width along vertical axis

//scans image line by line horizontally to find start of label

for (j=0; j<image_height; j++) {

makeLine(0, j, image_length, j);

profile = getProfile();

max_value = 0;

min_value = 255;

for (i=0; i<profile.length; i++) {

if (max_value<profile[i]) {

max_value = profile[i];

}

if (min_value>profile[i]) {

min_value = profile[i];

}

}

//stops scanning when finds start of label

if (max_value==255 && min_value==255) {

break;

}

}

//crops image to exclude label

makeRectangle(0, 0, image_length, j);

run("Crop");

selectWindow(new_name);

}

var param_table = "Image Parameters";

//measure angle and rotate macro; adapted from “Measure_Angle_And_Length.txt” macro

//requires line input from user - use Line Tool to draw line segment along edge of hair shaft

//measures angle of user-defined line segment with transverse axis and rotates image so hair shaft length lies along

//transverse axis

macro "Measure Angle and Rotate Action Tool" {

Roi.remove;

//pops up dialog box to direct user

waitForUser("Draw line along edge of hair shaft. Click ok when done");

//extracts line coordinates

getLine(x1, y1, x2, y2, lineWidth);

//if Line Tool not selected or no line input, exits out of macro

if (selectionType!=5 || x1==-1)

exit("Straight line selection along edge of hair shaft required");

getPixelSize(unit, length, height, depth);

x1*=length; y1*=height; x2*=length; y2*=height;

//finds angle of line with transverse axis using formula below

angle = getAngle(x1, y1, x2, y2);

length = sqrt((x2-x1)*(x2-x1)+(y2-y1)*(y2-y1));

//creates image parameters table

Table.create("Image Parameters");

param_table = Table.title;

//outputs angle and line length measurements

Table.set("Parameter", Table.size, "Image Name", param_table);

Table.set("Parameter Value", Table.size-1, getTitle(), param_table);

Table.set("Parameter", Table.size, "Angle", param_table);

Table.set("Parameter Value", Table.size-1, angle, param_table);

Table.set("Parameter", Table.size, "Line Length", param_table);

Table.set("Parameter Value", Table.size-1, length, param_table);

dx = x2-x1;

dy = y1-y2;

//calculates angle of rotation

if (dx<0)

angle_rot=angle-180.0;

else if (dx>=0 && dy>=0)

angle_rot=angle;

else

angle_rot=angle-360.0;

Table.set("Parameter", Table.size, "Angle of Rotation", param_table);

Table.set("Parameter Value", Table.size-1, angle_rot, param_table);

//rotates image based on angle of rotation

run("Rotate...", "angle=angle_rot grid=1 interpolation=Bilinear stack");

Table.update;

}

//formula to calculate angle (from “Measure_Angle_And_Length.txt” macro)

function getAngle(x1, y1, x2, y2) {

q1=0; q2orq3=2; q4=3; //quadrant

dx = x2-x1;

dy = y1-y2;

if (dx!=0)

angle = atan(dy/dx);

else {

if (dy>=0)

angle = PI/2;

else

angle = -PI/2;

}

angle = (180/PI)*angle;

if (dx>=0 && dy>=0)

quadrant = q1;

else if (dx<0)

quadrant = q2orq3;

else

quadrant = q4;

if (quadrant==q2orq3)

angle = angle+180.0;

else if (quadrant==q4)

angle = angle+360.0;

return angle;

}

//normalize image macro

//requires line input from user - use Line Tool to draw diagonal line spanning two corners of the hair segment

//defines region of interest, centered using 75% of length and width of hair segment as defined by diagonal line (Eqs.

//1 - 3)

//normalizes each pixel to average brightness along hair length and rescales average brightness to 109 (Eq. 4)

//rescales normalized pixel to be bounded between 109 and 255 if normalized value is greater than 109 (Eq. 5)

var param_table = Table.title;

macro "Normalize Image Action Tool" {

Roi.remove;

updateDisplay();

//pops up dialog box to direct user

waitForUser("Draw diagonal line from edge of one end of hair shaft to edge of other end. Click ok when done");

//extracts line coordinates

getLine(x1, y1, x2, y2, lineWidth);

//exits out of macro if Line Tool not selected or no line input

if(selectionType!=5 || x1==-1)

exit("Straight line selection along hair shaft diagonal required");

image_id = getImageID();

//extracts length and width of hair segment

image_length = abs(x2-x1);

image_height = abs(y2-y1);

//finds center of image

image_xcenter =(x1+x2)/2;

image_ycenter = (y1+y2)/2;

if (x1<x2) {

x_min = x1;

x_max = x2;

} else {

x_min = x2;

x_max = x1;

}

if (y1<y2) {

y_min = y1;

y_max = y2;

} else {

y_min = y2;

y_max = y1;

}

//outputs hair segment parameters

selectWindow(param_table);

Table.set("Parameter", Table.size, "Image Center_x", param_table);

Table.set("Parameter Value", Table.size-1, image_xcenter, param_table);

Table.set("Parameter", Table.size, "Image Center_y", param_table);

Table.set("Parameter Value", Table.size-1, image_ycenter, param_table);

Table.set("Parameter", Table.size, "Segment Length", param_table);

Table.set("Parameter Value", Table.size-1, image_length, param_table);

Table.set("Parameter", Table.size, "Segment Height", param_table);

Table.set("Parameter Value", Table.size-1, image_height, param_table);

//defines upper lefthand corner, length, and width of ROI (Eqs. 1 - 3)

rect_x = round(((x_min)/2)+((x_min)/4)+(x_min+x_max)/8);

rect_y = round(((y_min)/2)+((y_min)/4)+(y_max+y_min)/8);

rect_length = round((((x_max)/2)+((x_max)/4)+(x_min+x_max)/8))-rect_x;

rect_height = round((((y_max)/2)+((y_max)/4)+(y_max+y_min)/8))-rect_y;

Table.set("Parameter", Table.size, "ROI Length", param_table);

Table.set("Parameter Value", Table.size-1, rect_length, param_table);

Table.set("Parameter", Table.size, "ROI Height", param_table);

Table.set("Parameter Value", Table.size-1, rect_height, param_table);

Table.set("Parameter", Table.size, "ROI Upper LH_x", param_table);

Table.set("Parameter Value", Table.size-1, rect_x, param_table);

Table.set("Parameter", Table.size, "ROI Upper LH_y", param_table);

Table.set("Parameter Value", Table.size-1, rect_y, param_table);

//scans through raw ROI to obtain average brightness per line

j = rect_y;

m = rect_x;

k = 0;

profile_avg = newArray(rect_height+1);

while (j<=(rect_y+rect_height)) {

makeLine(rect_x, j, rect_x+rect_length, j);

profile = getProfile();

profile_sum = 0;

m = rect_x;

while (m<(rect_x+rect_length)) {

m=m+1;

profile_sum += profile[m-rect_x];

}

profile_avg[k] = profile_sum/profile.length;

profile_sum_ROI += profile_sum;

j=j+1;

k=k+1;

}

//scans through raw ROI to obtain maximum brightness value after normalizing to average line brightness

//and rescaling average to 109 (Eq. 4)

j = rect_y;

k = 0; //row_index

i = 0; //col_index

max_value = 0;

profile_normval = newArray(rect_length+1);

while (j<=(rect_y+rect_height)) {

profile_normval = newArray(rect_length+1);

makeLine(rect_x, j, rect_x+rect_length, j);

profile = getProfile();

m = rect_x;

i = 0;

while (m<(rect_x+rect_length)) {

profile_normval[i] = (profile[i]/profile_avg[k])*109;

if (profile_normval[i]>max_value) {

max_value=profile_normval[i];

}

m=m+1;

i=i+1;

}

j=j+1;

k=k+1;

}

//scans through raw ROI to apply normalization and rescaling to raw values (Eq. 4 and 5)

run("Clear Results");

j = rect_y;

k = 0; //row_index

i = 0; //col_index

profile_newval = newArray(rect_length+1);

profile_newval_avg = newArray(rect_height+1);

while (j<=(rect_y+rect_height)) {

profile_newval = newArray(rect_length+1);

makeLine(rect_x, j, rect_x+rect_length, j);

profile = getProfile();

m = rect_x;

i = 0;

profile_newval_sum = 0;

while (m<(rect_x+rect_length)) {

if ((profile[i]/profile_avg[k])*109>109) {

profile_newval[i] = 109+(146*(((profile[i]/profile_avg[k])*109)-109)/(max_value-109));

} else {

profile_newval[i] = (profile[i]/profile_avg[k])*109;

}

//generates array of normalized brightness values in Results Table (separate from

//param_table)

setResult(m, k, profile_newval[i]);

profile_newval_sum += profile_newval[i];

m=m+1;

i=i+1;

}

profile_newval_avg[k] = profile_newval_sum/profile.length;

profile_newval_sum_ROI += profile_newval_sum;

j=j+1;

k=k+1;

}

updateResults();

//sets brightness bounds between 0 and 255 in normalized ROI by temporarily converting 2 pixels to 0 and

//255, respectively

black_pix_x = rect_x;

white_pix_x = rect_x+1;

black_pix_orig = getResult(black_pix_x, 0);

white_pix_orig = getResult(white_pix_x, 0);

setResult(black_pix_x, 0, 0);

setResult(white_pix_x, 0, 255);

updateResults();

selectWindow("Results");

//converts array of normalized brightness values to 32-bit grayscale image

run("Results to Image");

//resets 2 pixels to normalized brightness values

setPixel(black_pix_x-rect_x, 0, black_pix_orig);

setPixel(white_pix_x-rect_x, 0, white_pix_orig);

updateDisplay();

setResult(black_pix_x, 0, black_pix_orig);

setResult(white_pix_x, 0, white_pix_orig);

updateResults();

IJ.renameResults("Normalized ROI Array");

run("Clear Results");

//calculates raw and normalized ROI average % brightness

profile_sum_ROI_avg = profile_sum_ROI/(profile.length*profile_avg.length);

profile_sum_ROI_avg_percent = (profile_sum_ROI_avg/255)*100;

profile_newval_sum_ROI_avg = profile_newval_sum_ROI/(profile_newval_avg.length*profile.length);

profile_newval_sum_ROI_avg_percent = (profile_newval_sum_ROI_avg/255)*100;

//outputs raw and normalized ROI average % brightness

selectWindow(param_table);

Table.set("Parameter", Table.size, "Raw Average % Brightness", param_table);

Table.set("Parameter Value", Table.size-1, profile_sum_ROI_avg_percent, param_table);

Table.set("Parameter", Table.size, "Normalized Average % Brightness", param_table);

Table.set("Parameter Value", Table.size-1, profile_newval_sum_ROI_avg_percent, param_table);

Table.update;

close("Normalized ROI Array");

selectWindow("Results Table");

rename("Normalized ROI");

}

//calculate histogram peak tailing macro

//defines peak apex to reduce histogram skew in event of multiple peaks (Eqs. 10 and 11)

//calculates tailing factor at 2% of peak height maximum (Eq. 12)

macro "Calculate Histogram Peak Tailing Action Tool" {

selectWindow("Normalized ROI");

//generates histogram of normalized ROI to find peak height maximum H and average brightness value

q = 0;

nBins = 256;

peak_height_max = 0;

average_brightness_sum = 0;

pixel_count = 0;

getHistogram(values, counts, nBins, 0, 255);

for (q=0; q<nBins; q++) {

if (counts[q]>peak_height_max) {

peak_height_max=counts[q];

brightness_max=q;

}

average_brightness_sum+=(counts[q]*q);

pixel_count+=counts[q];

}

average_brightness = average_brightness_sum/pixel_count;

//calculates peak lead and lag brightness values at full width half maximum for application to Eq. 10

//in event that brightness values are not integers, exact values are calculated using equation of a line from

//consecutive brightness values that bound the height at half maximum

height_halfmax = 0.5*peak_height_max;

for (r=255; r>brightness_max; r--) {

if ((counts[r]<=height_halfmax) && (counts[r-1]>=height_halfmax)) {

halfmax_lag_brightness = r;

halfmax_lag_brightness2 = r-1;

break;

}

}

slope = (counts[halfmax_lag_brightness]-counts[halfmax_lag_brightness2])/(1);

intercept = counts[halfmax_lag_brightness]-(slope*(halfmax_lag_brightness));

halfmax_lag_brightness_exact = (height_halfmax-intercept)/slope;

for (r=0; r<brightness_max; r++) {

if ((counts[r]<=height_halfmax) && (counts[r+1]>=height_halfmax)) {

halfmax_lead_brightness = r;

halfmax_lead_brightness2 = r+1;

break;

}

}

slope = (counts[halfmax_lead_brightness2]-counts[halfmax_lead_brightness])/(1);

intercept = counts[halfmax_lead_brightness2]-(slope*(halfmax_lead_brightness2));

halfmax_lead_brightness_exact = (height_halfmax-intercept)/slope;

//calculates averge brightness value between peak lead and lag at full width half maximum (Eq. 10)

k = round(halfmax_lead_brightness_exact);

average_brightness_halfmax_sum = 0;

pixel_count_halfmax_width = 0;

while (k<=round(halfmax_lag_brightness_exact)) {

average_brightness_halfmax_sum+=(counts[k]*k);

pixel_count_halfmax_width+=counts[k];

k=k+1;

}

average_brightness_halfmax = average_brightness_halfmax_sum/pixel_count_halfmax_width;

//redefines peak apex by comparing brightness at peak height maximum to average brightness when

//calculated between full width half maximum (Eq. 11)

selectWindow(param_table);

if (brightness_max<=(average_brightness_halfmax+3) && brightness_max>=(average_brightness_halfmax-3)) {

Table.set("Parameter", Table.size, "Brightness_Peak Height Maximum", param_table);

Table.set("Parameter Value", Table.size-1, brightness_max, param_table);

Table.set("Parameter", Table.size, "Brightness_Peak Apex", param_table);

Table.set("Parameter Value", Table.size-1, brightness_max, param_table);

} else {

Table.set("Parameter", Table.size, "Brightness_Peak Height Maximum", param_table);

Table.set("Parameter Value", Table.size-1, brightness_max, param_table);

brightness_max = round(average_brightness_halfmax);

Table.set("Parameter", Table.size, "Brightness_Peak Apex", param_table);

Table.set("Parameter Value", Table.size-1, brightness_max, param_table);

}

//calculates peak lead and lag brightness values at 0.02H for application to Eq. 12

//in event that brightness values are not integers, exact values are calculated using equation of a line from

//consecutive brightness values that bound height at 0.02H

height_tailing = 0.02*peak_height_max;

for (r=255; r>brightness_max; r--) {

if ((counts[r]<=height_tailing) && (counts[r-1]>=height_tailing)) {

tailing_lag_brightness = r;

tailing_lag_brightness2 = r-1;

break;

}

}

slope = (counts[tailing_lag_brightness]-counts[tailing_lag_brightness2])/(1);

intercept = counts[tailing_lag_brightness]-(slope*(tailing_lag_brightness));

tailing_lag_brightness_exact = (height_tailing-intercept)/slope;

for (r=0; r<brightness_max; r++) {

if ((counts[r]<=height_tailing) && (counts[r+1]>=height_tailing)) {

tailing_lead_brightness = r;

tailing_lead_brightness2 = r+1;

break;

}

}

slope = (counts[tailing_lead_brightness2]-counts[tailing_lead_brightness])/(1);

intercept = counts[tailing_lead_brightness2]-(slope*(tailing_lead_brightness2));

tailing_lead_brightness_exact = (height_tailing-intercept)/slope;

//calculates tailing factor at 0.02H (Eq. 12)

tailing_factor = (tailing_lag_brightness-tailing_lead_brightness)/(2*(brightness_max-tailing_lead_brightness));

//outputs peak lag tailing parameters

selectWindow(param_table);

Table.set("Parameter", Table.size, "Peak Height Maximum", param_table);

Table.set("Parameter Value", Table.size-1, peak_height_max, param_table);

Table.set("Parameter", Table.size, "Tailing_Peak Lead Brightness", param_table);

Table.set("Parameter Value", Table.size-1, tailing_lead_brightness_exact, param_table);

Table.set("Parameter", Table.size, "Tailing_Peak Lag Brightness", param_table);

Table.set("Parameter Value", Table.size-1, tailing_lag_brightness_exact, param_table);

Table.set("Parameter", Table.size, "Tailing Factor_0.02H", param_table);

Table.set("Parameter Value", Table.size-1, tailing_factor, param_table);

Table.update;

}

**Appendix 2.** ImageJ code (for version 1.52k) to quantify hair surface damage using image roughness (in lieu of macro 4 in Appendix 1).

//finds average roughness of image where roughness across the normalized ROI is binned into pixel-by-pixel, 10, 20,

//50, or 100 sections

//performs calculations after normalizing ROI (in lieu of calculating tailing factor)

var param_table = "Image Parameters";

selectWindow("Normalized ROI");

rect_length = getWidth();

rect_height = getHeight()-1;

//determines number of pixels binned to each section (section width) according to Eq. 7

sect10_length = floor(rect_length/10)+1;

sect20_length = floor(rect_length/20)+1;

sect50_length = floor(rect_length/50)+1;

sect100_length = floor(rect_length/100)+1;

j = 0; //height index

k = 0; //row_index

p = 0; //col_index

roughness_pixpix_array = newArray(rect_height+1);

roughness_pixpix_sum = 0;

roughness_sect100_array = newArray(rect_height+1);

roughness_sect100_sum = 0;

roughness_sect50_array = newArray(rect_height+1);

roughness_sect50_sum = 0;

roughness_sect20_array = newArray(rect_height+1);

roughness_sect20_sum = 0;

roughness_sect10_array = newArray(rect_height+1);

roughness_sect10_sum = 0;

//calculates roughness across each row of the image according to Eq. 9

while (j<=(rect_height)) {

makeLine(0, j, rect_length, j);

profile = getProfile();

m = 0; //length index

p = 0;

r = 0; //index for distance_pixpix_array

u = 1; //index for distance_sect100_array

v = 1; //index for distance_sect50_array

w = 1; //index for distance_sect20_array

z = 1; //index for distance_sect10_array

distance_pixpix_sum = 0;

distance_pixpix_array = newArray(rect_length);

distance_sect10_sum = 0;

distance_sect10_array = newArray((floor(rect_length/sect10_length)+1));

distance_sect20_sum = 0;

distance_sect20_array = newArray((floor(rect_length/sect20_length)+1));

distance_sect50_sum = 0;

distance_sect50_array = newArray((floor(rect_length/sect50_length)+1));

distance_sect100_sum = 0;

distance_sect100_array = newArray((floor(rect_length/sect100_length)+1));

while (m<(rect_length)) {

if (p>0) {

distance_pixpix_array[r] = sqrt(((profile[p]-profile[p-1])*(profile[p]-profile[p-1]))+1);

distance_pixpix_sum += distance_pixpix_array[r];

r=r+1;

}

if (p == (u*sect100_length) || m == (rect_length - 1)) {

pix_distance_sq_sect100 = (p-((u-1)*sect100_length))*(p-((u-1)*sect100_length));

distance_sect100_array[u-1] = sqrt(((profile[p]-profile[(u-1)*sect100_length])*(profile[p]-profile[(u-1)*sect100_length]))+pix_distance_sq_sect100);

distance_sect100_sum += distance_sect100_array[(u-1)];

u=u+1;

}

if (p == (v*sect50_length) || m == (rect_length - 1)) {

pix_distance_sq_sect50 = (p-((v-1)*sect50_length))*(p-((v-1)*sect50_length));

distance_sect50_array[v-1] = sqrt(((profile[p]-profile[(v-1)*sect50_length])*(profile[p]-profile[(v-1)*sect50_length]))+pix_distance_sq_sect50);

distance_sect50_sum += distance_sect50_array[v-1];

v=v+1;

}

if (p == (w*sect20_length) || m == (rect_length - 1)) {

pix_distance_sq_sect20 = (p-((w-1)*sect20_length))*(p-((w-1)*sect20_length));

distance_sect20_array[w-1] = sqrt(((profile[p]-profile[(w-1)*sect20_length])*(profile[p]-profile[(w-1)*sect20_length]))+pix_distance_sq_sect20);

distance_sect20_sum += distance_sect20_array[w-1];

w=w+1;

}

if (p == (z*sect10_length) || m == (rect_length - 1)) {

pix_distance_sq_sect10 = (p-((z-1)*sect10_length))*(p-((z-1)*sect10_length));

distance_sect10_array[z-1] = sqrt(((profile[p]-profile[(z-1)*sect10_length])*(profile[p]-profile[(z-1)*sect10_length]))+pix_distance_sq_sect10);

distance_sect10_sum += distance_sect10_array[z-1];

z=z+1;

}

m=m+1;

p=p+1;

}

roughness_pixpix_array[k] = distance_pixpix_sum/distance_pixpix_array.length;

roughness_pixpix_sum += roughness_pixpix_array[k];

roughness_sect100_array[k] = distance_sect100_sum/rect_length;

roughness_sect100_sum += roughness_sect100_array[k];

roughness_sect50_array[k] = distance_sect50_sum/rect_length;

roughness_sect50_sum += roughness_sect50_array[k];

roughness_sect20_array[k] = distance_sect20_sum/rect_length;

roughness_sect20_sum += roughness_sect20_array[k];

roughness_sect10_array[k] = distance_sect10_sum/rect_length;

roughness_sect10_sum += roughness_sect10_array[k];

j=j+1;

k=k+1;

}

//Calculates average image roughness in ROI

roughness_pixpix_avg = roughness_pixpix_sum/roughness_pixpix_array.length;

roughness_sect100_avg = roughness_sect100_sum/roughness_sect100_array.length;

roughness_sect50_avg = roughness_sect50_sum/roughness_sect50_array.length;

roughness_sect20_avg = roughness_sect20_sum/roughness_sect20_array.length;

roughness_sect10_avg = roughness_sect10_sum/roughness_sect10_array.length;

selectWindow(param_table);

Table.set("Parameter", Table.size, "Average Roughness Pixel-by-Pixel", param_table);

Table.set("Parameter Value", Table.size-1, roughness_pixpix_avg, param_table);

Table.set("Parameter", Table.size, "Average Roughness 10 Sections", param_table);

Table.set("Parameter Value", Table.size-1, roughness_sect10_avg, param_table);

Table.set("Parameter", Table.size, "Average Roughness 20 Sections", param_table);

Table.set("Parameter Value", Table.size-1, roughness_sect20_avg, param_table);

Table.set("Parameter", Table.size, "Average Roughness 50 Sections", param_table);

Table.set("Parameter Value", Table.size-1, roughness_sect50_avg, param_table);

Table.set("Parameter", Table.size, "Average Roughness 100 Sections", param_table);

Table.set("Parameter Value", Table.size-1, roughness_sect100_avg, param_table);

Table.update;
